# Supplementary material for: Genetic variants in antigen presentation-related genes influence susceptibility to hepatitis C virus and viral clearance: a case control study
Source: PubMed Central journal article supplement (PMC4279674; doi:10.1186/s12879-014-0716-8), 2014-12-21
Supplement: 12879_2014_716_MOESM1_ESM.pdf [file 12879_2014_716_MOESM1_ESM.pdf]

**Supplemental Table 1. Information of primers and probes for TaqMan allelic discrimination**

| Polymorphism         |        | Sequence(5'-3')                                                    |
|----------------------|--------|--------------------------------------------------------------------|
| <i>DMA</i> rs1050391 | Primer | F: AGGTCTTCTTCCAGGCAAGGA<br>R: GAGCTATAGACAGGAAGTGCTGAA            |
|                      | Probe  | FAM-CTAGACGTAGAAGCAG-MGB<br>HEX-AGCTAGACATAGAAGCAGA-MGB            |
| <i>DMA</i> rs1063478 | Primer | F: CCACCCATGCTGACAGTGA<br>R: AGTCCATCGACAGCTGAGACA                 |
|                      | Probe  | FAM-ATCATTCCGTCCCTGTG-MGB<br>HEX-CATCATTCCATCCCTGT-MGB             |
| <i>DMA</i> rs3135029 | Primer | F: TCGCTTGGGTGTTCCCTGTATAA<br>R: CAGGGCCCACGTGATCTG                |
|                      | Probe  | FAM-TAAGCTACAAATTCTGGCA-MGB<br>HEX-ATAAGCTACAAATTCGGGCAA-MGB       |
| <i>DMB</i> rs23544   | Primer | F: CCACTGTATTAGAGAGGACCTGGAA<br>R: ACCACCCACTCCCAAGAAAAT           |
|                      | Probe  | FAM-AGATGGATTCCCC-MGB<br>HEX-AGATGGGTTCCCC-MGB                     |
| <i>DMB</i> rs2071556 | Primer | F: GTTGAAATCTAAGGAGGCTAGAATAGTGTA<br>R: GGAGCGTGCTTGCTTTGAA        |
|                      | Probe  | FAM-ATTGCCAAATTTACAGCC-MGB<br>HEX-TGCCAAATTTACATCCT-MGB            |
| <i>DOA</i> rs408036  | Primer | F: CCAGGCCTTGGCCAGTT<br>R: GTAACACACAATGGGCCAAATG                  |
|                      | Probe  | FAM-TTGGCAGCCGTCCT-MGB<br>HEX-ATTGGCAGCCATC-MGB                    |
| <i>DOA</i> rs3128935 | Primer | F: TGTCGGGTGGACATGTTTAC<br>R: GGATCCACATGGTCTGTGTTCTC              |
|                      | Probe  | FAM-AGAACACCGCTAACA-MGB<br>HEX-AGAACACCGCCAACA-MGB                 |
| <i>DOA</i> rs3129304 | Primer | F: AAAACATACAAAGAGATAAATCACCATACC<br>R: TGAAAACCGTAATCTGTATTGCTCAT |
|                      | Probe  | FAM-CATAGTTTATGTCAGGACC-MGB<br>HEX-CATAGTTTATGTCAAGACC-MGB         |
| <i>DOA</i> rs376892  | Primer | F: CTTGGCTGTGGTCTGGTAACTG<br>R: CCTTCCTAGTCCACCTCAGACCTT           |
|                      | Probe  | FAM-TAATCAGGTGCCATTGG-MGB<br>HEX-TAATCAGGTGCCATCGG-MGB             |
| <i>DOA</i> rs369150  | Primer | F: GAAAGAAAGGAACAGGGCATGAC<br>R: GGCGGGAAGGTCCAGAGA                |
|                      | Probe  | FAM-TGATGGGAACCTAGG-MGB<br>HEX-TGATGGGAGCCTAGG-MGB                 |
| <i>DOA</i> rs86567   | Primer | F: GGTGCGGGTCTACAGATGGTT<br>R: GAGCAACAGTTATTGAGGAACTAGCAT         |
|                      | Probe  | FAM-TGGCCCCCATTG-MGB<br>HEX-TGGCCCACCATTG-MGB                      |
| <i>DOA</i> rs2284191 | Primer | F: TCCTCCATCTCAGAGCATTATGAC<br>R: TGTTGCTCAAACAACCTTCATAGAGTTC     |
|                      | Probe  | FAM-CTTCCATAACTGTTGTCTAG-MGB<br>HEX-TAACTGTTATCTAGTTTTCTGG-MGB     |
| <i>DOA</i> rs6913008 | Primer | F: GTCCTGTTTCAGAGTCATCCACTTT<br>R: TCCTCATCATCATGGGCACAT           |

| <b>Polymorphism</b>  |        | <b>Sequence(5'-3')</b>                                           |
|----------------------|--------|------------------------------------------------------------------|
| <i>DOA</i> rs6913008 | Probe  | FAM-CCCAGACTCCCGG-MGB<br>HEX-CCCAGACTCCTGG-MGB                   |
| <i>DOA</i> rs2582    | Primer | F: TGATCCTTCTGAGAGAAATGACTTGT<br>R: CACAGCGGGATGCACTTAAA         |
|                      | Probe  | FAM-TGTGACAGACCCTGC-MGB<br>HEX-TGTGACAGCCCCTG-MGB                |
| <i>DOA</i> rs416622  | Primer | F: CAGCCTGGTGACAGAGTGAGA<br>R: TCACCCAGACCTACTGAATTAGAATCT       |
|                      | Probe  | FAM-AGACAGCCCCCTGT-MGB<br>HEX-AGACAGCCTCCCTGTT-MGB               |
| <i>DOA</i> rs453779  | Primer | F: GTCACCCGTGGAGGCACTA<br>R: AACGTCCCTTAATCCCAGTCCTA             |
|                      | Probe  | FAM-AGGAACAGGCCCTG-MGB<br>HEX-AGGAACGGGCCCTG-MGB                 |
| <i>DOA</i> rs1044429 | Primer | F: TCACACAAAGAGGGTTTCTGTTACTG<br>R: GAATAAGTTGAAATCAATGACCAGAAGA |
|                      | Probe  | FAM-TGAGATGATTCTCCTCCAC-MGB<br>HEX-TGAGATGATTTTCTCCTCCAC-MGB     |
| <i>DOB</i> rs2857111 | Primer | F: TCTCTTGCCTCCGTTCTCATT<br>R: TGCTACATATTTCTAAAAGCCACTCTCATA    |
|                      | Probe  | FAM-TCCCCTCCCTGGAGA-MGB<br>HEX-CTCCCCTCCCTAGAG-MGB               |
| <i>DOB</i> rs11244   | Primer | F: CAAGGGCATTGTCCAGAAACTC<br>R: GCTGGACCACAGAAAAGTAAATGA         |
|                      | Probe  | FAM-ACTCCTTCCAGTCCCA-MGB<br>HEX-CTCCTTCCAGCCCCA-MGB              |
| <i>DOB</i> rs1383258 | Primer | F: TTACCAGACACGTTTAGAATGGATTC<br>R: GAGTTCACAGCACATTGTAATTATTGG  |
|                      | Probe  | FAM-AGAAGAGATGAGAGAGTC-MGB<br>HEX-CAAGAGAAGAGACGAGAG-MGB         |
| <i>DOB</i> rs2071469 | Primer | F: GAAGCCAGAAAAACAGCGATTTAT<br>R: AGGGGACCCACCCAGAAC             |
|                      | Probe  | FAM-TGAATTTTATGAACTCATTC-MGB<br>HEX-TGAATTTTATGAGCTCATTC-MGB     |
| <i>DOB</i> rs2071472 | Primer | F: GACTGGATTCTCCATGACTCAA<br>R: CATGCCAATTCTTGCATACACA           |
|                      | Probe  | FAM-AACAGAGCAATTGTT-MGB<br>HEX-AACAGAGCAATTATT-MGB               |
| <i>DOB</i> rs7383287 | Primer | F: CGTAATTTACCAGGCATGGGTTT<br>R: CAGTCAGCCTTTGCCTGAATC           |
|                      | Probe  | FAM-TTCCAGAAGATTTTG-MGB<br>HEX-TTTCCAGAAGACTTTG-MGB              |
| <i>DOB</i> rs2856997 | Primer | F: CCAAATCCAATGCTAGCTAGAGAAA<br>R: ATGGGCTGTGAGAATCTGTAACC       |
|                      | Probe  | FAM-CATGGAGTTACCCCC-MGB<br>HEX-CCATGGAGTTACCACC-MGB              |
| <i>DOB</i> rs2071471 | Primer | F: CATGCCAATTCTTGCATACACACT<br>R: GGTGGCTCTGCTAGTGAATCTGA        |
|                      | Probe  | FAM-CTGGAGAATCTGTGC-MGB<br>HEX-CTGGAGAGTCTGTGC-MGB               |
| <i>DOB</i> rs2071475 | Primer | F: GGTCTCTCTGGGTACACTGTCA<br>R: GGTTTTCTTTACGGTGTCTCAT           |
|                      | Probe  | FAM-CTAGGAAGGGAGGAAA-MGB<br>HEX-ACTAGGAAGAGAGGAAA-MGB            |

| Polymorphism             |        | Sequence(5'-3')                                                          |
|--------------------------|--------|--------------------------------------------------------------------------|
| <i>DOB</i> rs2856995     | Primer | F: CTCCCCTCCCTAGAGAATCCA<br>R: AAGAAACAGAATGGGATTCAACAGA                 |
|                          | Probe  | FAM-TGTCTGGTATGTCTCTAA-MGB<br>HEX-TGTCTGGTAAGTCTC-MGB                    |
| <i>TAP1</i> rs1135216    | Primer | F: CACACATGTGGCTATACCGTTCTC<br>R: TCGCTGACCCCCTGACA                      |
|                          | Probe  | FAM-TGCAGAGGTAGGCG-MGB<br>HEX-TCTGCAGAGGTAGACG-MGB                       |
| <i>TAP2</i> rs1800454    | Primer | F: CCTGGAACGCGCCTTGTA<br>R: CCTTTCACAACCACTCTGGTATCTT                    |
|                          | Probe  | FAM-TGCTCGTAAGGAGG-MGB<br>HEX-CTGCTCATAAGGAGG-MGB                        |
| <i>LMP2</i> rs17587      | Primer | F: TGAACCGAGTGTGTTGACAAGCT<br>R: GCTGAACCAGAGAGTGCACAGT                  |
|                          | Probe  | FAM- CTGCACGAGCGCA-MGB<br>HEX- CTGCACGAGCACAT-MGB                        |
| <i>LMP7</i> rs2071543    | Primer | F: GCGACCCTCCACTCCTCA<br>R: GGACACTACAGTTTCTCTATGCGATCT                  |
|                          | Probe  | FAM- CCGACCTTCATTCC-MGB<br>HEX- CCGACCTGCATTC-MGB                        |
| <i>tapasin</i> rs9277972 | Primer | F: GTCTAGGTCCCTTCAGGTAGAAGTAATCTTT<br>R: CTAAGTGAAATTGCATACTGTTTTACTCTAC |
|                          | Probe  | FAM-CCTATAAGGTTAAACTGTTCT-MGB<br>HEX-CCTATAAGGTTTAACTGTTCT-MGB           |
| <i>tapasin</i> rs1059288 | Primer | F: TGGGCCTTAGGTCCCTATGC<br>R: AAGTGATCGTGTGAGTCGTCGTT                    |
|                          | Probe  | FAM-CAGACAGGCCGGTC-MGB<br>HEX-ACAGACAGGCCAGTC-MGB                        |
| <i>tapasin</i> rs2282851 | Primer | F: CCTCATTCTTGAATTATCTGCACAGT<br>R: GCCCAGGAGTCAGAAGCTTTT                |
|                          | Probe  | FAM-CCACGTCTCAGCCTA-MGB<br>HEX-CCACGTCCCAGCCT-MGB                        |

**Supplemental Table 2. Comparison results of SNPs distribution in dominant, recessive, and additive models**

| SNPs                  | Location         | Dominant              |      | Recessive             |      | Additive              |      | Dominant              |      | Recessive             |      | Additive              |      |
|-----------------------|------------------|-----------------------|------|-----------------------|------|-----------------------|------|-----------------------|------|-----------------------|------|-----------------------|------|
|                       |                  | <i>P</i> Value*       | FDR* | <i>P</i> Value*       | FDR* | <i>P</i> Value*       | FDR* | <i>P</i> Value†       | FDR† | <i>P</i> Value†       | FDR† | <i>P</i> Value†       | FDR† |
| <i>DMA</i> rs1050391  | intron(C>T)      | 1.25×10 <sup>-1</sup> | 0.64 | 7.70×10 <sup>-1</sup> | 0.85 | 1.60×10 <sup>-1</sup> | 0.68 | 4.66×10 <sup>-1</sup> | 0.79 | 3.54×10 <sup>-1</sup> | 0.75 | 3.47×10 <sup>-1</sup> | 0.84 |
| <i>DMA</i> rs1063478  | Missense(C>T)    | 3.50×10 <sup>-2</sup> | 0.64 | 4.44×10 <sup>-1</sup> | 0.82 | 4.90×10 <sup>-2</sup> | 0.68 | 8.47×10 <sup>-1</sup> | 0.96 | 6.81×10 <sup>-1</sup> | 0.88 | 7.44×10 <sup>-1</sup> | 0.90 |
| <i>DMA</i> rs3135029  | 5'near gene(C>A) | 1.66×10 <sup>-1</sup> | 0.64 | 7.43×10 <sup>-2</sup> | 0.82 | 1.95×10 <sup>-1</sup> | 0.71 | 3.43×10 <sup>-1</sup> | 0.73 | 6.95×10 <sup>-1</sup> | 0.88 | 3.44×10 <sup>-1</sup> | 0.84 |
| <i>DMB</i> rs23544    | intron(G>A)      | 7.50×10 <sup>-2</sup> | 0.64 | 2.88×10 <sup>-1</sup> | 0.82 | 6.60×10 <sup>-2</sup> | 0.68 | 1.83×10 <sup>-1</sup> | 0.72 | 3.56×10 <sup>-1</sup> | 0.75 | 5.71×10 <sup>-1</sup> | 0.87 |
| <i>DMB</i> rs2071556  | intron(C>A)      | 3.32×10 <sup>-1</sup> | 0.74 | 2.66×10 <sup>-1</sup> | 0.82 | 2.08×10 <sup>-1</sup> | 0.71 | 6.95×10 <sup>-1</sup> | 0.91 | 3.49×10 <sup>-1</sup> | 0.75 | 4.48×10 <sup>-1</sup> | 0.87 |
| <i>DOA</i> rs408036   | 3'UTR(G>A)       | 3.14×10 <sup>-1</sup> | 0.74 | 7.18×10 <sup>-1</sup> | 0.85 | 6.64×10 <sup>-1</sup> | 0.88 | 7.21×10 <sup>-1</sup> | 0.91 | 1.90×10 <sup>-1</sup> | 0.75 | 5.92×10 <sup>-1</sup> | 0.87 |
| <i>DOA</i> rs3128935  | 3'UTR(T>C)       | 3.11×10 <sup>-1</sup> | 0.74 | 5.05×10 <sup>-1</sup> | 0.82 | 2.98×10 <sup>-1</sup> | 0.72 | 2.18×10 <sup>-1</sup> | 0.72 | 3.76×10 <sup>-1</sup> | 0.75 | 1.75×10 <sup>-1</sup> | 0.82 |
| <i>DOA</i> rs3129304  | 3'UTR(A>G)       | 5.12×10 <sup>-1</sup> | 0.83 | 2.16×10 <sup>-1</sup> | 0.82 | 3.85×10 <sup>-1</sup> | 0.86 | 6.50×10 <sup>-1</sup> | 0.91 | 9.90×10 <sup>-1</sup> | 0.99 | 6.66×10 <sup>-1</sup> | 0.87 |
| <i>DOA</i> rs376892   | 3'UTR(C>T)       | 5.43×10 <sup>-1</sup> | 0.83 | 8.30×10 <sup>-2</sup> | 0.82 | 2.55×10 <sup>-1</sup> | 0.72 | 3.17×10 <sup>-1</sup> | 0.72 | 4.20×10 <sup>-2</sup> | 0.42 | 9.18×10 <sup>-1</sup> | 0.92 |
| <i>DOA</i> rs369150   | intron(G>A)      | 5.64×10 <sup>-1</sup> | 0.83 | 9.98×10 <sup>-1</sup> | 1.00 | 6.85×10 <sup>-1</sup> | 0.88 | 3.00×10 <sup>-1</sup> | 0.72 | 3.29×10 <sup>-1</sup> | 0.75 | 2.17×10 <sup>-1</sup> | 0.82 |
| <i>DOA</i> rs86567    | intron(A>C)      | 8.94×10 <sup>-1</sup> | 0.96 | 2.42×10 <sup>-1</sup> | 0.82 | 4.59×10 <sup>-1</sup> | 0.86 | 8.30×10 <sup>-2</sup> | 0.71 | 4.98×10 <sup>-1</sup> | 0.85 | 1.28×10 <sup>-1</sup> | 0.82 |
| <i>DOA</i> rs2284191  | intron(G>A)      | 4.10×10 <sup>-2</sup> | 0.64 | 7.72×10 <sup>-1</sup> | 0.85 | 5.00×10 <sup>-2</sup> | 0.68 | 1.40×10 <sup>-2</sup> | 0.24 | 6.83×10 <sup>-1</sup> | 0.88 | 2.40×10 <sup>-2</sup> | 0.41 |
| <i>DOA</i> rs6913008  | intron(C>T)      | 1.21×10 <sup>-1</sup> | 0.64 | 2.28×10 <sup>-1</sup> | 0.82 | 8.7×10 <sup>-1</sup>  | 0.90 | 3.99×10 <sup>-1</sup> | 0.79 | 4.36×10 <sup>-1</sup> | 0.78 | 6.43×10 <sup>-1</sup> | 0.87 |
| <i>DOA</i> rs2582     | 3'UTR(C>A)       | 7.87×10 <sup>-1</sup> | 0.89 | 9.33×10 <sup>-1</sup> | 0.96 | 8.38×10 <sup>-1</sup> | 0.90 | 5.26×10 <sup>-1</sup> | 0.81 | 7.76×10 <sup>-1</sup> | 0.94 | 6.51×10 <sup>-1</sup> | 0.87 |
| <i>DOA</i> rs416622   | 3'UTR(G>A)       | 9.49×10 <sup>-1</sup> | 0.96 | 3.75×10 <sup>-1</sup> | 0.82 | 6.94×10 <sup>-1</sup> | 0.88 | 3.00×10 <sup>-3</sup> | 0.10 | 3.00×10 <sup>-1</sup> | 0.75 | 1.02×10 <sup>-1</sup> | 0.82 |
| <i>DOA</i> rs453779   | intron(C>T)      | 6.39×10 <sup>-1</sup> | 0.86 | 7.03×10 <sup>-1</sup> | 0.85 | 8.57×10 <sup>-1</sup> | 0.90 | 4.32×10 <sup>-1</sup> | 0.79 | 9.00×10 <sup>-1</sup> | 0.99 | 5.19×10 <sup>-1</sup> | 0.87 |
| <i>DOA</i> rs1044429  | 3'UTR(G>A)       | 7.45×10 <sup>-1</sup> | 0.89 | 6.73×10 <sup>-1</sup> | 0.85 | 6.64×10 <sup>-1</sup> | 0.88 | 9.18×10 <sup>-1</sup> | 0.96 | 8.12×10 <sup>-1</sup> | 0.94 | 8.57×10 <sup>-1</sup> | 0.92 |
| <i>DOB</i> rs2857111  | intron(A>G)      | 6.54×10 <sup>-1</sup> | 0.86 | 4.69×10 <sup>-1</sup> | 0.82 | 8.96×10 <sup>-1</sup> | 0.90 | 2.73×10 <sup>-1</sup> | 0.72 | 3.45×10 <sup>-1</sup> | 0.75 | 2.18×10 <sup>-1</sup> | 0.82 |
| <i>DOB</i> rs11244    | 3'UTR(C>T)       | 4.26×10 <sup>-1</sup> | 0.80 | 7.30×10 <sup>-1</sup> | 0.85 | 5.30×10 <sup>-1</sup> | 0.86 | 5.19×10 <sup>-1</sup> | 0.81 | 8.26×10 <sup>-1</sup> | 0.94 | 5.43×10 <sup>-1</sup> | 0.87 |
| <i>DOB</i> rs1383258  | intron(G>A)      | 1.36×10 <sup>-1</sup> | 0.64 | 4.36×10 <sup>-1</sup> | 0.82 | 2.63×10 <sup>-1</sup> | 0.72 | 4.52×10 <sup>-1</sup> | 0.79 | 6.30×10 <sup>-2</sup> | 0.43 | 8.24×10 <sup>-1</sup> | 0.92 |
| <i>DOB</i> rs2071469  | 5'UTR(A>G)       | 1.92×10 <sup>-1</sup> | 0.64 | 1.66×10 <sup>-1</sup> | 0.82 | 1.21×10 <sup>-1</sup> | 0.68 | 2.73×10 <sup>-1</sup> | 0.72 | 3.75×10 <sup>-1</sup> | 0.75 | 2.45×10 <sup>-1</sup> | 0.83 |
| <i>DOB</i> rs2071472  | intron(G>A)      | 5.31×10 <sup>-1</sup> | 0.83 | 4.81×10 <sup>-1</sup> | 0.82 | 4.21×10 <sup>-1</sup> | 0.86 | 8.61×10 <sup>-1</sup> | 0.96 | 4.38×10 <sup>-1</sup> | 0.78 | 5.98×10 <sup>-1</sup> | 0.87 |
| <i>DOB</i> rs7383287  | synonymous(A>G)  | 9.61×10 <sup>-1</sup> | 0.96 | 5.58×10 <sup>-1</sup> | 0.82 | 8.00×10 <sup>-1</sup> | 0.90 | 2.50×10 <sup>-2</sup> | 0.28 | 1.00×10 <sup>-2</sup> | 0.15 | 9.00×10 <sup>-3</sup> | 0.31 |
| <i>DOB</i> rs2856997  | intron(T>G)      | 7.21×10 <sup>-1</sup> | 0.89 | 4.42×10 <sup>-1</sup> | 0.82 | 8.22×10 <sup>-1</sup> | 0.90 | 2.44×10 <sup>-1</sup> | 0.72 | 2.43×10 <sup>-1</sup> | 0.75 | 1.50×10 <sup>-1</sup> | 0.82 |
| <i>DOB</i> rs2071471  | synonymous(C>T)  | 7.87×10 <sup>-1</sup> | 0.89 | 5.36×10 <sup>-1</sup> | 0.82 | 6.96×10 <sup>-1</sup> | 0.88 | 7.10×10 <sup>-1</sup> | 0.91 | 6.62×10 <sup>-1</sup> | 0.88 | 8.00×10 <sup>-1</sup> | 0.92 |
| <i>DOB</i> rs2071475  | intron(C>T)      | 3.70×10 <sup>-1</sup> | 0.74 | 8.50×10 <sup>-1</sup> | 0.90 | 5.26×10 <sup>-1</sup> | 0.86 | 2.16×10 <sup>-1</sup> | 0.72 | 6.27×10 <sup>-1</sup> | 0.88 | 4.45×10 <sup>-1</sup> | 0.87 |
| <i>DOB</i> rs2856995  | intron(T>A)      | 3.11×10 <sup>-1</sup> | 0.74 | 5.05×10 <sup>-1</sup> | 0.82 | 2.98×10 <sup>-1</sup> | 0.72 | 2.64×10 <sup>-1</sup> | 0.72 | 9.81×10 <sup>-1</sup> | 0.99 | 4.30×10 <sup>-1</sup> | 0.87 |
| <i>TAP1</i> rs1135216 | Missense(A>G)    | 3.53×10 <sup>-1</sup> | 0.74 | 7.07×10 <sup>-1</sup> | 0.85 | 5.00×10 <sup>-1</sup> | 0.86 | 6.73×10 <sup>-1</sup> | 0.91 | 3.18×10 <sup>-1</sup> | 0.75 | 4.78×10 <sup>-1</sup> | 0.87 |

| SNPs                     | Location         | Dominant              |      | Recessive             |      | Additive              |      | Dominant              |      | Recessive             |      | Additive              |      |
|--------------------------|------------------|-----------------------|------|-----------------------|------|-----------------------|------|-----------------------|------|-----------------------|------|-----------------------|------|
|                          |                  | <i>P</i> Value*       | FDR* | <i>P</i> Value*       | FDR* | <i>P</i> Value*       | FDR* | <i>P</i> Value†       | FDR† | <i>P</i> Value†       | FDR† | <i>P</i> Value†       | FDR† |
| <i>TAP2</i> rs1800454    | Missense(G>A)    | 5.52×10 <sup>-1</sup> | 0.83 | 3.18×10 <sup>-1</sup> | 0.82 | 8.30×10 <sup>-1</sup> | 0.90 | 1.58×10 <sup>-1</sup> | 0.72 | 5.59×10 <sup>-1</sup> | 0.88 | 3.05×10 <sup>-1</sup> | 0.84 |
| <i>LMP2</i> rs17587      | Missense(G>A)    | 1.70×10 <sup>-1</sup> | 0.64 | 2.55×10 <sup>-1</sup> | 0.82 | 1.32×10 <sup>-1</sup> | 0.68 | 3.03×10 <sup>-1</sup> | 0.72 | 9.00×10 <sup>-3</sup> | 0.15 | 7.70×10 <sup>-2</sup> | 0.82 |
| <i>LMP7</i> rs2071543    | Missense(C>A)    | 6.02×10 <sup>-1</sup> | 0.85 | 4.75×10 <sup>-1</sup> | 0.82 | 4.89×10 <sup>-1</sup> | 0.86 | 7.49×10 <sup>-1</sup> | 0.91 | 4.90×10 <sup>-2</sup> | 0.42 | 3.18×10 <sup>-1</sup> | 0.84 |
| <i>tapasin</i> rs9277972 | intron(A>T)      | 1.29×10 <sup>-1</sup> | 0.64 | 7.48×10 <sup>-1</sup> | 0.85 | 1.55×10 <sup>-1</sup> | 0.68 | 9.79×10 <sup>-1</sup> | 0.98 | 2.35×10 <sup>-1</sup> | 0.75 | 6.97×10 <sup>-1</sup> | 0.88 |
| <i>tapasin</i> rs1059288 | 5'near gene(T>C) | 2.07×10 <sup>-1</sup> | 0.64 | 1.00×10 <sup>-1</sup> | 0.82 | 8.2×10 <sup>-2</sup>  | 0.68 | 9.29×10 <sup>-1</sup> | 0.96 | 6.84×10 <sup>-1</sup> | 0.88 | 8.77×10 <sup>-1</sup> | 0.92 |
| <i>tapasin</i> rs2282851 | intron(C>T)      | 9.03×10 <sup>-1</sup> | 0.96 | 3.13×10 <sup>-1</sup> | 0.82 | 6.10×10 <sup>-1</sup> | 0.88 | 9.02×10 <sup>-1</sup> | 0.96 | 9.51×10 <sup>-1</sup> | 0.99 | 9.01×10 <sup>-1</sup> | 0.92 |

Logistic regression analyses adjusted for age, gender, experience of blood/plasma donation, and numbers of blood/plasma donation.

\* HCV infected cases (including both resolvers and chronic cases) versus uninfected subjects.

† HCV chronic cases versus HCV resolvers.

**Supplemental Table 3. Conditional analyses of selected SNPs in additive genetic model**

| <b>a) SNPs associated with anti-HCV status</b> |                                     |                                     |                                     |                                     |                                     |                                     |
|------------------------------------------------|-------------------------------------|-------------------------------------|-------------------------------------|-------------------------------------|-------------------------------------|-------------------------------------|
| SNPs                                           | OR (95%CI) <sup>a</sup>             | OR(95%CI) <sup>b</sup>              | OR (95%CI) <sup>c</sup>             |                                     |                                     |                                     |
| rs1063478                                      | <b>0.77(0.62,0.97)</b> <sup>d</sup> | 0.79(0.64,0.98)                     | 0.78(0.63-0.98)                     |                                     |                                     |                                     |
| rs2284191                                      | 1.42(1.02,1.97)                     | <b>1.45(1.03,2.03)</b> <sup>d</sup> | 1.41(1.00-1.97)                     |                                     |                                     |                                     |
| rs11244                                        | 1.23(0.97,1.56)                     | 1.27(1.01,1.62)                     | <b>1.24(0.98-1.57)</b> <sup>d</sup> |                                     |                                     |                                     |
| <b>b) SNPs associated with HCV chronicity</b>  |                                     |                                     |                                     |                                     |                                     |                                     |
| SNPs                                           | OR (95%CI) <sup>e</sup>             | OR(95%CI) <sup>f</sup>              | OR (95%CI) <sup>g</sup>             | OR (95%CI) <sup>h</sup>             | OR (95%CI) <sup>i</sup>             | OR (95%CI) <sup>j</sup>             |
| rs17587                                        | <b>0.71(0.52,0.97)</b> <sup>k</sup> | 0.72(0.53,0.99)                     | 0.77(0.57,1.04)                     | 0.75(0.55,1.01)                     | 0.77(0.57,1.05)                     | 0.78(0.58,1.06)                     |
| rs2071543                                      | 0.77(0.58,1.04)                     | <b>0.80(0.59,1.08)</b> <sup>k</sup> | 0.84(0.63,1.12)                     | 0.86(0.64,1.15)                     | 0.83(0.62,1.11)                     | 0.83(0.62,1.10)                     |
| rs2284191                                      | 0.65(0.45,0.95)                     | 0.66(0.45,0.96)                     | <b>0.71(0.46,1.10)</b> <sup>k</sup> | 0.66(0.45,0.97)                     | 0.65(0.45,0.95)                     | 0.70(0.46,1.07)                     |
| rs7383287                                      | 0.72(0.58,0.92)                     | 0.74(0.59,0.92)                     | 0.73(0.59,0.92)                     | <b>0.74(0.59,0.92)</b> <sup>k</sup> | 0.73(0.58,0.91)                     | 0.74(0.59,0.92)                     |
| rs376892                                       | 0.97(0.73,1.30)                     | 0.96(0.72,1.29)                     | 0.98(0.73,1.32)                     | 0.96(0.72,1.29)                     | <b>1.08(0.74,1.57)</b> <sup>k</sup> | 1.17(0.82,1.67)                     |
| rs416622                                       | 0.83(0.65,1.06)                     | 0.81(0.64,1.04)                     | 0.90(0.69,1.18)                     | 0.83(0.65,1.07)                     | 0.76(0.56,1.02)                     | <b>0.89(0.63,1.27)</b> <sup>k</sup> |

Logistic regression analyses adjusted for age, gender, experience of blood/plasma donation, and numbers of blood/plasma donation.

<sup>a</sup> Logistic regression analyses conditioned on rs1063478

<sup>b</sup> Logistic regression analyses conditioned on rs2284191

<sup>c</sup> Logistic regression analyses conditioned on rs11244

<sup>d</sup> Logistic regression analyses conditioned on the other two polymorphisms

<sup>e</sup> Logistic regression analyses conditioned on rs17587

<sup>f</sup> Logistic regression analyses conditioned on rs2071543

<sup>g</sup> Logistic regression analyses conditioned on rs2284191

<sup>h</sup> Logistic regression analyses conditioned on rs7383287

<sup>i</sup> Logistic regression analyses conditioned on rs376892

<sup>j</sup> Logistic regression analyses conditioned on rs416622

<sup>k</sup> Logistic regression analyses conditioned on the other five polymorphisms

**Supplemental Table 4. Stratified analyses of combined favorable alleles and HCV infection outcomes**

| <b>a) SNPs associated with anti-HCV status (rs1063478-T and rs2284191-G, 0-2 vs.3-4)</b> |                   |                 |                   |          |
|------------------------------------------------------------------------------------------|-------------------|-----------------|-------------------|----------|
| <b>Variables</b>                                                                         | <b>Uninfected</b> | <b>Infected</b> | <b>OR (95%CI)</b> | <b>P</b> |
| Age                                                                                      |                   |                 |                   | 0.123    |
| <60                                                                                      | 152/142           | 250/159         | 0.62 (0.43-0.88)  |          |
| ≥60                                                                                      | 112/76            | 189/127         | 0.84 (0.53-1.34)  |          |
| Gender                                                                                   |                   |                 |                   | 0.023    |
| Male                                                                                     | 77/57             | 99/60           | 0.75 (0.41-1.38)  |          |
| Female                                                                                   | 187/161           | 340/226         | 0.68 (0.49-0.94)  |          |
| Blood donation                                                                           |                   |                 |                   | 0.971    |
| Never                                                                                    | 33/24             | 50/29           | 0.55 (0.24-1.28)  |          |
| Ever                                                                                     | 231/194           | 389/257         | 0.69 (0.51-0.94)  |          |
| Numbers of blood donation                                                                |                   |                 |                   | 0.691    |
| <30                                                                                      | 137/113           | 234/159         | 0.79 (0.54-1.15)  |          |
| ≥30                                                                                      | 127/105           | 205/127         | 0.61 (0.40-0.93)  |          |
| Plasma donation                                                                          |                   |                 |                   | 0.024    |
| Never                                                                                    | 80/64             | 18/25           | 1.14 (0.51-2.57)  |          |
| Ever                                                                                     | 184/154           | 421/261         | 0.66 (0.49-0.90)  |          |
| Numbers of plasma donation                                                               |                   |                 |                   | 0.706    |
| <50                                                                                      | 199/164           | 251/156         | 0.67 (0.47-0.95)  |          |
| ≥50                                                                                      | 65/54             | 188/130         | 0.72 (0.45-1.16)  |          |
| <b>b) SNPs associated with HCV chronicity (rs17587-A and rs7383287-G, 0 vs.1-4 )</b>     |                   |                 |                   |          |
| <b>Variables</b>                                                                         | <b>Resolver</b>   | <b>Chronic</b>  | <b>OR (95%CI)</b> | <b>P</b> |
| Age                                                                                      |                   |                 |                   | 0.105    |
| <60                                                                                      | 38/73             | 154/144         | 0.49 (0.31-0.78)  |          |
| ≥60                                                                                      | 33/49             | 103/131         | 0.90 (0.53-1.51)  |          |
| Gender                                                                                   |                   |                 |                   | 0.923    |
| Male                                                                                     | 15/24             | 61/59           | 0.51 (0.23-1.13)  |          |
| Female                                                                                   | 56/98             | 196/216         | 0.63 (0.43-0.93)  |          |
| Blood donation                                                                           |                   |                 |                   | 0.332    |
| Never                                                                                    | 6/17              | 27/29           | 0.41 (0.13-1.36)  |          |
| Ever                                                                                     | 65/105            | 230/246         | 0.67 (0.47-0.97)  |          |
| Numbers of blood donation                                                                |                   |                 |                   | 0.144    |
| <30                                                                                      | 33/78             | 127/155         | 0.50 (0.31-0.81)  |          |
| ≥30                                                                                      | 38/44             | 130/120         | 0.80 (0.48-1.33)  |          |
| Plasma donation                                                                          |                   |                 |                   | 0.403    |

| <b>Variables</b>           | <b>Resolver</b> | <b>Chronic</b> | <b>OR (95%CI)</b> | <b>P</b> |
|----------------------------|-----------------|----------------|-------------------|----------|
| Never                      | 6/8             | 12/17          | 0.70 (0.09-5.35)  |          |
| Ever                       | 65/114          | 245/258        | 0.61 (0.43-0.87)  |          |
| Numbers of plasma donation |                 |                |                   | 0.167    |
| <50                        | 44/61           | 146/156        | 0.91 (0.57-1.46)  |          |
| ≥50                        | 27/6            | 111/119        | 0.46 (0.27-0.78)  |          |

Logistic regression analyses adjusted for age, gender, experience of blood/plasma donation, and numbers of blood/plasma donation (excluded the stratified factor in each stratum).

<sup>a</sup>P value for the heterogeneity test.



**Supplemental Table 5. Linkage disequilibrium (LD) information in uninfected subjects**

| <b>a) LD of rs1063478, rs2284191, and rs11244</b> |                   |                   |                   |  |  |  |
|---------------------------------------------------|-------------------|-------------------|-------------------|--|--|--|
|                                                   | rs1063478         | rs2284191         | rs11244           |  |  |  |
| rs1063478                                         | --                | 0.10 <sup>a</sup> | 0.21 <sup>a</sup> |  |  |  |
| rs2284191                                         | 0 <sup>b</sup>    | --                | 0.04 <sup>a</sup> |  |  |  |
| rs11244                                           | 0.01 <sup>b</sup> | 0 <sup>b</sup>    | --                |  |  |  |

  

| <b>b) LD of rs17587, rs2071543, rs2284191, rs7383287, rs376892, and rs416622</b> |                   |                   |                   |                   |                   |                   |
|----------------------------------------------------------------------------------|-------------------|-------------------|-------------------|-------------------|-------------------|-------------------|
|                                                                                  | rs17587           | rs2071543         | rs2284191         | rs7383287         | rs376892          | rs416622          |
| rs17587                                                                          | --                | 0.87 <sup>a</sup> | 0.04 <sup>a</sup> | 0.24 <sup>a</sup> | 0.05 <sup>a</sup> | 0.34 <sup>a</sup> |
| rs2071543                                                                        | 0.04 <sup>b</sup> | --                | 0.02 <sup>a</sup> | 0.08 <sup>a</sup> | 0.01 <sup>a</sup> | 0.08 <sup>a</sup> |
| rs2284191                                                                        | 0 <sup>b</sup>    | 0 <sup>b</sup>    | --                | 0.03 <sup>a</sup> | 0.10 <sup>a</sup> | 0.94 <sup>a</sup> |
| rs7383287                                                                        | 0 <sup>b</sup>    | 0.01 <sup>b</sup> | 0 <sup>b</sup>    | --                | 0.01 <sup>a</sup> | 0.08 <sup>a</sup> |
| rs376892                                                                         | 0 <sup>b</sup>    | 0 <sup>b</sup>    | 0 <sup>b</sup>    | 0 <sup>b</sup>    | --                | 0.82 <sup>a</sup> |
| rs416622                                                                         | 0 <sup>b</sup>    | 0 <sup>b</sup>    | 0.19 <sup>b</sup> | 0 <sup>b</sup>    | 0.34 <sup>b</sup> | --                |

<sup>a</sup> D', <sup>b</sup> R
